# Supplementary material for: Six-Year Incidence of Visual Impairment in a Multiethnic Asian Population: The Singapore Epidemiology of Eye Diseases Study
Source: PubMed Central journal article supplement (PMC10630666; doi:10.1016/j.xops.2023.100392), 2023-09-03
Supplement: mmc1.pdf [file mmc1.pdf]

**Table S1. Previous Studies which Evaluated Incidence of Visual Impairment, Based on US and WHO definition**

| Country         | Study                   | Author (Year)         | Years of follow up | Age Mean ( $\pm$ SD) | Cumulative Incidence Based on US Definition* (%) |                      |                           |                          | Cumulative Incidence Based on WHO definition** (%) |                      |                           |                          |  |
|-----------------|-------------------------|-----------------------|--------------------|----------------------|--------------------------------------------------|----------------------|---------------------------|--------------------------|----------------------------------------------------|----------------------|---------------------------|--------------------------|--|
|                 |                         |                       |                    |                      | Presenting Low Vision                            | Presenting Blindness | Best-Corrected Low Vision | Best-Corrected Blindness | Presenting Low Vision                              | Presenting Blindness | Best-Corrected Low Vision | Best-Corrected Blindness |  |
| <b>Asia</b>     |                         |                       |                    |                      |                                                  |                      |                           |                          |                                                    |                      |                           |                          |  |
| Singapore       | SEED                    | Current Study         | 6                  | 56.1 ( $\pm$ 8.9)    | 9.2                                              | 0.3                  | 3.3                       | 0.2                      | 4.1                                                | 0.2                  | 1.3                       | 0.1                      |  |
| China           | BES <sup>1</sup>        | You, 2011             | 5                  | 55.3 ( $\pm$ 10.1)   | 3.8                                              | -                    | 1.1                       | 0.1                      | 1.7                                                | -                    | 0.5                       | 0.1                      |  |
|                 | Handan <sup>2</sup>     | Hu, 2020              | 6                  | 51.4 ( $\pm$ 11.1)   | -                                                | -                    | -                         | -                        | 7.4                                                | 0.6                  | 1.6                       | 0.1                      |  |
|                 | Liwan <sup>3</sup>      | Wang, 2013            | 5                  | 63.4 ( $\pm$ 9.0)    | 20.6                                             | 1.77                 | 9.85                      | 1.42                     | 12.4                                               | 0.33                 | 5.38                      | 0.33                     |  |
|                 | ZOCS <sup>4</sup>       | Han, 2019             | 6                  | 52.3 ( $\pm$ 11.6)   | 12.2 <sup>†</sup>                                | 0.14 <sup>†</sup>    | -                         | -                        | 8.33 <sup>†</sup>                                  | 0 <sup>†</sup>       | -                         | -                        |  |
| India           | CEDIS <sup>5</sup>      | Vijaya, 2014          | 6                  | 52.8 ( $\pm$ 9.7)    | -                                                | -                    | -                         | -                        | -                                                  | -                    | -                         | 0.48                     |  |
|                 | APEDS <sup>6</sup>      | Khanna, 2021          | 15                 | 28.0 ( $\pm$ 17.5)   | 25.5                                             | 3.6                  | 12.9                      | 1.8                      | -                                                  | 1.3                  | -                         | 1.3                      |  |
| Iran            | ShECS <sup>7</sup>      | Hashemi, 2016         | 5                  | 50.9 ( $\pm$ 6.2)    | -                                                | -                    | -                         | -                        | 1.02                                               | 0.13                 | 0.11                      | 0.09                     |  |
| <b>Africa</b>   |                         |                       |                    |                      |                                                  |                      |                           |                          |                                                    |                      |                           |                          |  |
| Kenya           | NEDCS <sup>8</sup>      | Bastawrous, 2016      | 6                  | 62.5 ( $\pm$ 9.3)    | -                                                | 2.59                 | -                         | -                        | -                                                  | 1.51                 | -                         | -                        |  |
| <b>Americas</b> |                         |                       |                    |                      |                                                  |                      |                           |                          |                                                    |                      |                           |                          |  |
| Caribbean       | BISED <sup>9</sup>      | Hennis, 2009          | 9                  | - <sup>‡</sup>       | -                                                | -                    | 6.4                       | 2.1                      | -                                                  | -                    | 4.5                       | 1.0                      |  |
| North America   | BDES <sup>10</sup>      | Klein, 2013           | 20                 | 75.4 (-)             | -                                                | -                    | -                         | 0.4                      | -                                                  | -                    | -                         | -                        |  |
|                 | LALES <sup>11</sup>     | Varma, 2010           | 4                  | 54.7 ( $\pm$ 10.5)   | 2.9 <sup>†</sup>                                 | 0.3 <sup>†</sup>     | 1.2                       | 0.3                      | 1.8 <sup>†</sup>                                   | 0.2 <sup>†</sup>     | 0.7                       | 0.2                      |  |
| <b>Europe</b>   |                         |                       |                    |                      |                                                  |                      |                           |                          |                                                    |                      |                           |                          |  |
| Iceland         | Reykjavik <sup>12</sup> | Gunnlaugsdottir, 2010 | 5                  | 64.7 ( $\pm$ 9.7)    | -                                                | -                    | 3.49                      | 0.95                     | -                                                  | -                    | 1.07                      | 0.35                     |  |
| Italy           | Ponza <sup>13</sup>     | Nucci, 2005           | 12                 | 55.5 ( $\pm$ 9.4)    | -                                                | -                    | -                         | -                        | -                                                  | -                    | 3.9                       | 0.7                      |  |
|                 | Priverno <sup>14</sup>  | Cedrone, 2002         | 7                  | 57.0 ( $\pm$ 6.7)    | -                                                | -                    | -                         | -                        | -                                                  | -                    | 1.3                       | 0.2                      |  |
| <b>Oceania</b>  |                         |                       |                    |                      |                                                  |                      |                           |                          |                                                    |                      |                           |                          |  |
| Australia       | BMES <sup>15</sup>      | Hong, 2013            | 15                 | 64.3 ( $\pm$ 8.6)    | -                                                | -                    | -                         | 0.9                      | -                                                  | -                    | -                         | -                        |  |
|                 | MVIP <sup>16</sup>      | Dimitrov, 2003        | 5                  | 59.0 ( $\pm$ 12.0)   | 3.72                                             | 0.43                 | -                         | -                        | 1.11                                               | 0.28                 | -                         | -                        |  |

SD= Standard Deviation; SEED= Singapore Epidemiology of Eye Diseases; BES= Beijing Eye Study; ZOCS= Zhongshan Ophthalmic Center Study; CEDIS= Chennai Eye Disease Incidence Study; APEDS= Andhra Pradesh Eye Disease Study; ShECS= Shahroud Eye Cohort Study; NEDCS= Nakuru Eye Disease Cohort Study; BISED= Barbados Incidence Study of Eye Diseases; BDES= Beaver Dam Eye Study; LALES= Los Angeles Latino Eye Study; BMES= Blue Mountain Eye Study; MVIP= Melbourne Visual Impairment Project

\*US definition based on visual acuity of better-seeing eye – low vision was defined as <20/40 but ≥20/200; blindness was defined as <20/200

\*\*WHO definition based on visual acuity of better-seeing eye – low vision was defined as <20/60 but ≥20/400; blindness was defined as <20/400

†Low vision and blindness was defined using binocular presenting visual acuity

‡Mean (±SD) of age was not included in manuscript; age range of participants at baseline was 40 to 84 years.

1. You QS, Xu L, Yang H, Wang YX, Jonas JB. Five-year incidence of visual impairment and blindness in adult Chinese the Beijing Eye Study. *Ophthalmology*. Jun 2011;118(6):1069-75. doi:10.1016/j.ophtha.2010.09.032
2. Hu A, Gu SZ, Friedman DS, Cao K, Wang N. Six-Year Incidence and Causes of Low Vision and Blindness in a Rural Chinese Adult Population: The Handan Eye Study. *Ophthalmic Epidemiol*. Apr 2021;28(2):160-168. doi:10.1080/09286586.2020.1795886
3. Wang L, Huang W, He M, et al. Causes and Five-Year Incidence of Blindness and Visual Impairment in Urban Southern China: The Liwan Eye Study. *Investigative Ophthalmology & Visual Science*. 2013;54(6):4117-4121. doi:10.1167/iovs.13-11911
4. Han X, Liao C, Liu C, et al. Incidence and correction of vision impairment among elderly population in southern urban China. *Clin Exp Ophthalmol*. May 2019;47(4):439-444. doi:10.1111/ceo.13431
5. Vijaya L, Asokan R, Panday M, et al. Baseline Risk Factors for Incidence of Blindness in a South Indian Population: The Chennai Eye Disease Incidence Study. *Investigative Ophthalmology & Visual Science*. 2014;55(9):5545-5550. doi:10.1167/iovs.14-14614
6. Khanna RC, Marmamula S, Pendri P, et al. Incidence, Incident Causes, and Risk Factors of Visual Impairment and Blindness in a Rural Population in India: 15-Year Follow-up of the Andhra Pradesh Eye Disease Study. *American journal of ophthalmology*. Mar 2021;223:322-332. doi:10.1016/j.ajo.2020.09.035
7. Hashemi H, Mehravaran S, Emamian MH, Fotouhi A. Five-Year Incidence of Visual Impairment in Middle-Aged Iranians: The Shahroud Eye Cohort Study. *Ophthalmic Epidemiol*. Feb 2017;24(1):11-16. doi:10.1080/09286586.2016.1255342
8. Bastawrous A, Mathenge W, Wing K, et al. Six-Year Incidence of Blindness and Visual Impairment in Kenya: The Nakuru Eye Disease Cohort Study. *Investigative ophthalmology & visual science*. 2016;57(14):5974-5983. doi:10.1167/iovs.16-19835
9. Hennis AJ, Wu SY, Nemesure B, Hyman L, Schachat AP, Leske MC. Nine-year incidence of visual impairment in the Barbados Eye Studies. *Ophthalmology*. Aug 2009;116(8):1461-8. doi:10.1016/j.ophtha.2009.02.017
10. Klein R, Lee KE, Gangnon RE, Klein BE. Incidence of visual impairment over a 20-year period: the Beaver Dam Eye Study. *Ophthalmology*. Jun 2013;120(6):1210-9. doi:10.1016/j.ophtha.2012.11.041
11. Varma R, Chung J, Foong AW, Torres M, Choudhury F, Azen SP. Four-year incidence and progression of visual impairment in Latinos: the Los Angeles Latino Eye Study. *Am J Ophthalmol*. May 2010;149(5):713-27. doi:10.1016/j.ajo.2009.12.011
12. Gunnlaugsdottir E, Arnarsson A, Jonasson F. Five-year incidence of visual impairment and blindness in older Icelanders: the Reykjavik Eye Study. <https://doi.org/10.1111/j.1755-3768.2008.01445.x>. *Acta Ophthalmologica*. 2010/05/01 2010;88(3):358-366. doi:<https://doi.org/10.1111/j.1755-3768.2008.01445.x>
13. Nucci C, Cedrone C, Culasso F, et al. Incidence of visual loss in the Ponza Eye Study, Italy. *Eye (Lond)*. Feb 2005;19(2):175-82. doi:10.1038/sj.eye.6701444
14. Cedrone C, Culasso F, Cesareo M, et al. Incidence of blindness and low vision in a sample population: the Priverno Eye Study, Italy. *Ophthalmology*. Mar 2003;110(3):584-8. doi:10.1016/s0161-6420(02)01898-5
15. Hong T, Mitchell P, Rochtchina E, Fong CS, Chia EM, Wang JJ. Long-term changes in visual acuity in an older population over a 15-year period: the Blue Mountains Eye Study. *Ophthalmology*. Oct 2013;120(10):2091-9. doi:10.1016/j.ophtha.2013.03.032
16. Dimitrov PN, Mukesh BN, McCarty CA, Taylor HR. Five-year incidence of bilateral cause-specific visual impairment in the Melbourne Visual Impairment Project. *Invest Ophthalmol Vis Sci*. Dec 2003;44(12):5075-81. doi:10.1167/iovs.02-0457

**Table S3. Comparison of Baseline Characteristics between Subjects with and without Incident Best-Corrected Visual Impairment**

| Baseline characteristics                 | Subjects without incident best-corrected VI* (n= 6,302) | Subjects with incident best-corrected VI* (n=222) | P-value† |
|------------------------------------------|---------------------------------------------------------|---------------------------------------------------|----------|
| Age, years                               | 56.6 (9.0)                                              | 67.4 (9.0)                                        | <0.001   |
| Female Gender, n (%)                     | 3244 (51.5)                                             | 118 (53.2)                                        | 0.623    |
| Ethnicity, n (%)                         |                                                         |                                                   |          |
| • Malay                                  | 1687 (26.8)                                             | 113 (50.9)                                        | <0.001   |
| • Indian                                 | 2096 (33.3)                                             | 47 (21.2)                                         |          |
| • Chinese                                | 2519 (40.0)                                             | 62 (27.9)                                         |          |
| Diabetes Mellitus, n (%)                 | 1588 (25.2)                                             | 89 (40.1)                                         | <0.001   |
| Hyperlipidaemia, n (%)                   | 2728 (44.3)                                             | 100 (47.8)                                        | 0.312    |
| Hypertension, n (%)                      | 3631 (57.8)                                             | 183 (82.4)                                        | <0.001   |
| History of Cardiovascular Disease, n (%) | 514 (8.2)                                               | 41 (18.5)                                         | <0.001   |
| Chronic Kidney Disease, n (%)            | 445 (7.3)                                               | 64 (30.9)                                         | <0.001   |
| Alcohol Intake, n (%)                    | 585 (9.3)                                               | 13 (5.9)                                          | 0.081    |
| Current Smoking, n (%)                   | 927 (14.7)                                              | 21 (9.5)                                          | 0.029    |
| Body Mass Index, kg/m <sup>2</sup>       | 25.4 (4.5)                                              | 24.9 (4.4)                                        | 0.113    |
| Type of Housing, n (%)                   |                                                         |                                                   |          |
| • 1-2 room public flat                   | 287 (4.6)                                               | 44 (19.9)                                         | <0.001   |
| • 3-4 room public flat                   | 3781 (60.2)                                             | 144 (65.2)                                        |          |
| • 5 room public flat and better          | 2216 (35.3)                                             | 33 (14.9)                                         |          |
| Monthly Income, n (%)                    |                                                         |                                                   |          |
| • <SGD \$2,000                           | 4418 (71.8)                                             | 208 (94.1)                                        | <0.001   |
| • ≥SGD \$2,000                           | 1739 (28.2)                                             | 13 (5.9)                                          |          |
| Education Level, n (%)                   |                                                         |                                                   |          |
| • No formal education                    | 1059 (16.8)                                             | 119 (53.6)                                        | <0.001   |
| • Formal education‡                      | 5232 (83.2)                                             | 103 (46.4)                                        |          |

VI= Visual Impairment, SGD= Singapore Dollars

Data presented as mean (standard deviation) or number (percentage), where appropriate.

\*Based on US definition – VI was defined as VA<20/40 (i.e. inclusive of low vision and blindness, based on better-seeing eye).

†P-value was estimated based on chi-squared or independent t-test, where appropriate

‡Formal education was defined as having primary or higher education.

**Table S4. Comparison of Baseline Characteristics between Ethnicities**

| <b>Baseline characteristics</b>          | <b>Malay<br/>(n=1526)</b> | <b>Indian<br/>(n=1837)</b> | <b>Chinese<br/>(n=2188)</b> | <b>P-value</b> |
|------------------------------------------|---------------------------|----------------------------|-----------------------------|----------------|
| Age, years                               | 59.2 (11.0)               | 57.8 (10.1)                | 59.7 (9.9)                  | <0.001         |
| Female Gender, n (%)                     | 789 (51.7)                | 908 (49.4)                 | 1104 (50.5)                 | 0.422          |
| Diabetes Mellitus, n (%)                 | 423 (27.7)                | 651 (35.4)                 | 334 (15.3)                  | <0.001         |
| Hyperlipidaemia, n (%)                   | 600 (39.8)                | 819 (46.0)                 | 958 (44.9)                  | 0.001          |
| Hypertension, n (%)                      | 953 (62.7)                | 1011 (55.1)                | 1210 (55.4)                 | <0.001         |
| History of Cardiovascular Disease, n (%) | 134 (8.8)                 | 209 (11.4)                 | 112 (5.1)                   | <0.001         |
| Chronic Kidney Disease, n (%)            | 216 (14.7)                | 88 (4.9)                   | 85 (4.0)                    | <0.001         |
| Alcohol Intake, n (%)                    | 28 (1.8)                  | 240 (13.1)                 | 250 (11.4)                  | <0.001         |
| Current Smoking, n (%)                   | 303 (19.9)                | 248 (13.5)                 | 273 (12.5)                  | <0.001         |
| Body Mass Index, kg/m <sup>2</sup>       | 26.4 (5.1)                | 26.2 (4.8)                 | 23.7 (3.7)                  | <0.001         |
| Type of Housing, n (%)                   |                           |                            |                             | <0.001         |
| • 1-2 room public flat                   | 178 (11.7)                | 54 (3.0)                   | 23 (1.1)                    |                |
| • 3-4 room public flat                   | 1026 (67.4)               | 1066 (58.3)                | 1174 (53.8)                 |                |
| • 5 room public flat and better          | 319 (20.9)                | 707 (38.7)                 | 986 (45.2)                  |                |
| Monthly Income, n (%)                    |                           |                            |                             | <0.001         |
| • <SGD \$2,000                           | 1267 (83.6)               | 1216 (68.0)                | 1328 (62.5)                 |                |
| • ≥SGD \$2,000                           | 248 (16.4)                | 572 (32.0)                 | 797 (37.5)                  |                |
| Education Level, n (%)                   |                           |                            |                             | <0.001         |
| • No formal education                    | 279 (18.3)                | 222 (12.1)                 | 323 (14.8)                  |                |
| • Formal education <sup>‡</sup>          | 1244 (81.7)               | 1609 (87.9)                | 1865 (85.2)                 |                |

SGD= Singapore Dollars

Data presented as mean (standard deviation) or number (percentage), where appropriate.

†P-value was estimated based on one-way analysis of variance or chi-squared test, where appropriate

‡Formal education was defined as having primary or higher education.

**Table S6. 6-Year Incidence of Low Vision and Blindness (Based on WHO Definition, Better-Seeing Eye)**

|                                   | Vision Status                         | Age (year)                 | Overall                    |                             | Malay                      |                            | Indian  |          | Chinese |          |         |
|-----------------------------------|---------------------------------------|----------------------------|----------------------------|-----------------------------|----------------------------|----------------------------|---------|----------|---------|----------|---------|
|                                   |                                       |                            | At risk                    | Case (%)                    | At risk                    | Case (%)                   | At risk | Case (%) | At risk | Case (%) |         |
| Based on Presenting Visual Acuity | Incident Low Vision*                  | 40 - 49                    | 1,739                      | 31 (1.8)                    | 506                        | 7 (1.4)                    | 645     | 16 (2.5) | 588     | 8 (1.4)  |         |
|                                   |                                       | 50 - 59                    | 2,275                      | 71 (3.1)                    | 625                        | 29 (4.6)                   | 718     | 21 (2.9) | 932     | 21 (2.3) |         |
|                                   |                                       | 60 - 69                    | 1,532                      | 83 (5.4)                    | 382                        | 38 (9.9)                   | 514     | 19 (3.7) | 636     | 26 (4.1) |         |
|                                   |                                       | 70+                        | 680                        | 72 (10.6)                   | 197                        | 40 (20.3)                  | 178     | 8 (4.5)  | 305     | 24 (7.9) |         |
|                                   |                                       | Total                      | 6,226                      | 257 (4.1)                   | 1,710                      | 114 (6.7)                  | 2,055   | 64 (3.1) | 2,461   | 79 (3.2) |         |
|                                   |                                       | Age-standardized† (95% CI) | <b>4.26 (3.62 to 5.07)</b> | <b>8.04 (3.30 to 20.60)</b> | <b>3.15 (2.33 to 4.34)</b> | <b>3.46 (2.57 to 4.71)</b> |         |          |         |          |         |
|                                   | Incident Blindness*                   | 40 - 49                    | 1,810                      | 0 (0.0)                     | 536                        | 0 (0.0)                    | 666     | 0 (0.0)  | 608     | 0 (0.0)  |         |
|                                   |                                       | 50 - 59                    | 2,396                      | 3 (0.1)                     | 669                        | 1 (0.1)                    | 760     | 1 (0.1)  | 967     | 1 (0.1)  |         |
|                                   |                                       | 60 - 69                    | 1,684                      | 2 (0.1)                     | 420                        | 1 (0.2)                    | 562     | 0 (0.0)  | 702     | 1 (0.1)  |         |
|                                   |                                       | 70+                        | 848                        | 10 (1.2)                    | 263                        | 5 (1.9)                    | 207     | 1 (0.5)  | 378     | 4 (1.1)  |         |
|                                   |                                       | Total                      | 6,738                      | 15 (0.2)                    | 1,888                      | 7 (0.4)                    | 2,195   | 2 (0.1)  | 2,655   | 6 (0.2)  |         |
|                                   |                                       | Age-standardized† (95% CI) | <b>0.35 (0.15 to 0.74)</b> | <b>1.35 (0.24 to 4.40)</b>  | <b>0.18 (0.01 to 0.80)</b> | <b>0.17 (0.06 to 0.68)</b> |         |          |         |          |         |
|                                   | Based on Best-Corrected Visual Acuity | Incident Low Vision*       | 40 - 49                    | 1,806                       | 5 (0.3)                    | 533                        | 3 (0.6) | 665      | 1 (0.2) | 608      | 1 (0.2) |
|                                   |                                       |                            | 50 - 59                    | 2,385                       | 13 (0.5)                   | 662                        | 9 (1.4) | 759      | 3 (0.4) | 964      | 1 (0.1) |
| 60 - 69                           |                                       |                            | 1,665                      | 22 (1.3)                    | 411                        | 13 (3.2)                   | 557     | 6 (1.1)  | 697     | 3 (0.4)  |         |
| 70+                               |                                       |                            | 806                        | 44 (5.5)                    | 243                        | 31 (12.8)                  | 200     | 5 (2.5)  | 363     | 8 (2.2)  |         |
| Total                             |                                       |                            | 6,662                      | 84 (1.3)                    | 1,849                      | 56 (3.0)                   | 2,181   | 15 (0.7) | 2,632   | 13 (0.5) |         |
| Age-standardized† (95% CI)        |                                       |                            | <b>1.18 (0.89 to 1.63)</b> | <b>2.15 (1.60 to 7.10)</b>  | <b>0.66 (0.32 to 1.37)</b> | <b>0.52 (0.23 to 1.22)</b> |         |          |         |          |         |
| Incident Blindness*               |                                       | 40 - 49                    | 1,810                      | 0 (0.0)                     | 536                        | 0 (0.0)                    | 666     | 0 (0.0)  | 608     | 0 (0.0)  |         |
|                                   |                                       | 50 - 59                    | 2,394                      | 1 (0.0)                     | 667                        | 1 (0.1)                    | 760     | 0 (0.0)  | 967     | 0 (0.0)  |         |
|                                   |                                       | 60 - 69                    | 1,685                      | 1 (0.1)                     | 419                        | 0 (0.0)                    | 563     | 0 (0.0)  | 703     | 1 (0.1)  |         |
|                                   |                                       | 70+                        | 850                        | 6 (0.7)                     | 263                        | 2 (0.8)                    | 208     | 0 (0.0)  | 379     | 4 (1.1)  |         |
|                                   |                                       | Total                      | 6,739                      | 8 (0.1)                     | 1,885                      | 3 (0.2)                    | 2,197   | 0 (0.0)  | 2,657   | 5 (0.2)  |         |
|                                   |                                       | Age-standardized† (95% CI) | <b>0.15 (0.04 to 0.46)</b> | <b>0.82 (0.04 to 4.16)</b>  | <b>0.00</b>                | <b>0.14 (0.04 to 0.65)</b> |         |          |         |          |         |

CI= Confidence Interval

\*Based on WHO definition – low vision was defined as <20/60 but ≥20/400; blindness was defined as <20/400.

†Incidence were evaluated and standardized to Singapore Population Census 2010.

**Table S7. 6-Year Incidence of Low Vision and Blindness, Stratified by Sex (Based on Better-Seeing Eye; US and WHO Definition)**

|                                       | Vision Status       | Age (year)                 | US Definition*           |                         |                         |                         |                        |                        | WHO Definition** |           |      |           |        |           |
|---------------------------------------|---------------------|----------------------------|--------------------------|-------------------------|-------------------------|-------------------------|------------------------|------------------------|------------------|-----------|------|-----------|--------|-----------|
|                                       |                     |                            | Overall                  |                         | Male                    |                         | Female                 |                        | Overall          |           | Male |           | Female |           |
|                                       |                     |                            | At risk                  | Case (%)                | At risk                 | Case (%)                | At risk                | Case (%)               | At risk          | Case (%)  | n    | Case (%)  | n      | Case (%)  |
| Based on Presenting Visual Acuity     | Incident Low Vision | 40 - 49                    | 1,657                    | 85 (5.1)                | 778                     | 38 (4.9)                | 879                    | 47 (5.3)               | 1,739            | 31 (1.8)  | 803  | 13 (1.6)  | 936    | 18 (1.9)  |
|                                       |                     | 50 - 59                    | 2,087                    | 143 (6.9)               | 996                     | 68 (6.8)                | 1091                   | 75 (6.9)               | 2,275            | 71 (3.1)  | 1072 | 32 (3.0)  | 1203   | 39 (3.2)  |
|                                       |                     | 60 - 69                    | 1,299                    | 164 (12.6)              | 691                     | 93 (13.5)               | 608                    | 71 (11.7)              | 1,532            | 83 (5.4)  | 791  | 42 (5.3)  | 741    | 41 (5.5)  |
|                                       |                     | 70+                        | 501                      | 115 (23.0)              | 280                     | 66 (23.6)               | 221                    | 49 (22.2)              | 680              | 72 (10.6) | 363  | 38 (10.5) | 317    | 34 (10.7) |
|                                       |                     | Total                      | 5,544                    | 507 (9.2)               | 2745                    | 265 (9.7)               | 2799                   | 242 (8.6)              | 6,226            | 257 (4.1) | 3029 | 125 (4.1) | 3197   | 132 (4.1) |
|                                       |                     | Age-standardized† (95% CI) | <b>9.4 (8.5 to 10.3)</b> | <b>9.5 (8.4 - 10.8)</b> | <b>9.2 (8.0 - 10.5)</b> | <b>4.3 (3.6 to 5.1)</b> | <b>3.9 (3.2 - 4.7)</b> | <b>4.2 (3.5 - 5.0)</b> |                  |           |      |           |        |           |
|                                       | Incident Blindness  | 40 - 49                    | 1,805                    | 0 (0.0)                 | 835                     | 0 (0.0)                 | 970                    | 0 (0.0)                | 1,810            | 0 (0.0)   | 835  | 0 (0.0)   | 975    | 0 (0.0)   |
|                                       |                     | 50 - 59                    | 2,390                    | 3 (0.1)                 | 1113                    | 1 (0.1)                 | 1277                   | 2 (0.2)                | 2,396            | 3 (0.1)   | 1114 | 2 (0.2)   | 1282   | 1 (0.1)   |
|                                       |                     | 60 - 69                    | 1,680                    | 5 (0.3)                 | 853                     | 3 (0.4)                 | 827                    | 2 (0.2)                | 1,684            | 2 (0.1)   | 854  | 0 (0.0)   | 830    | 2 (0.2)   |
|                                       |                     | 70+                        | 840                      | 15 (1.8)                | 434                     | 6 (1.4)                 | 406                    | 9 (2.2)                | 848              | 10 (1.2)  | 435  | 2 (0.5)   | 413    | 8 (1.9)   |
|                                       |                     | Total                      | 6,715                    | 23 (0.3)                | 3235                    | 10 (0.3)                | 3480                   | 13 (0.4)               | 6,738            | 15 (0.2)  | 3238 | 4 (0.1)   | 3500   | 11 (0.3)  |
| Age-standardized† (95% CI)            |                     | <b>0.3 (0.2 to 0.5)</b>    | <b>0.3 (0.1 - 0.5)</b>   | <b>0.4 (0.2 - 0.7)</b>  | <b>0.4 (0.2 to 0.7)</b> | <b>0.1 (0.0 - 0.3)</b>  | <b>0.3 (0.2 - 0.6)</b> |                        |                  |           |      |           |        |           |
| Based on Best-Corrected Visual Acuity | Incident Low Vision | 40 - 49                    | 1,800                    | 12 (0.7)                | 832                     | 5 (0.6)                 | 968                    | 7 (0.7)                | 1,806            | 5 (0.3)   | 834  | 2 (0.2)   | 972    | 3 (0.3)   |
|                                       |                     | 50 - 59                    | 2,370                    | 34 (1.4)                | 1110                    | 15 (1.4)                | 1260                   | 19 (1.5)               | 2,385            | 13 (0.5)  | 1111 | 2 (0.2)   | 1274   | 11 (0.9)  |
|                                       |                     | 60 - 69                    | 1,628                    | 75 (4.6)                | 833                     | 36 (4.3)                | 795                    | 39 (4.9)               | 1,665            | 22 (1.3)  | 845  | 8 (0.9)   | 820    | 14 (1.7)  |
|                                       |                     | 70+                        | 721                      | 96 (13.3)               | 385                     | 46 (11.9)               | 336                    | 50 (14.9)              | 806              | 44 (5.5)  | 423  | 16 (3.8)  | 383    | 28 (7.3)  |
|                                       |                     | Total                      | 6,519                    | 217 (3.3)               | 3160                    | 102 (3.2)               | 3359                   | 115 (3.4)              | 6,662            | 84 (1.3)  | 3213 | 28 (0.9)  | 3449   | 56 (1.6)  |
|                                       |                     | Age-standardized† (95% CI) | <b>3.3 (2.9 to 3.8)</b>  | <b>3.0 (2.4 - 3.7)</b>  | <b>3.6 (2.9 - 4.3)</b>  | <b>1.2 (0.9 to 1.6)</b> | <b>0.8 (0.5 - 1.2)</b> | <b>1.7 (1.2 - 2.2)</b> |                  |           |      |           |        |           |
|                                       | Incident Blindness  | 40 - 49                    | 1,809                    | 0 (0.0)                 | 835                     | 0 (0.0)                 | 974                    | 0 (0.0)                | 1,810            | 0 (0.0)   | 835  | 0 (0.0)   | 975    | 0 (0.0)   |
|                                       |                     | 50 - 59                    | 2,393                    | 1 (0.04)                | 1113                    | 0 (0.0)                 | 1280                   | 1 (0.1)                | 2,394            | 1 (0.0)   | 1114 | 0 (0.0)   | 1280   | 1 (0.1)   |
|                                       |                     | 60 - 69                    | 1,683                    | 2 (0.1)                 | 855                     | 2 (0.2)                 | 828                    | 0 (0.0)                | 1,685            | 1 (0.1)   | 856  | 0 (0.0)   | 829    | 1 (0.1)   |
|                                       |                     | 70+                        | 847                      | 11 (1.3)                | 435                     | 2 (0.5)                 | 412                    | 9 (2.2)                | 850              | 6 (0.7)   | 435  | 1 (0.2)   | 415    | 5 (1.2)   |
|                                       |                     | Total                      | 6,732                    | 14 (0.2)                | 3238                    | 4 (0.1)                 | 3494                   | 10 (0.3)               | 6,739            | 8 (0.1)   | 3240 | 1 (0.0)   | 3499   | 7 (0.2)   |
| Age-standardized† (95% CI)            |                     | <b>0.2 (0.1 to 0.4)</b>    | <b>0.1 (0.0 - 0.3)</b>   | <b>0.3 (0.2 - 0.6)</b>  | <b>0.2 (0.0 to 0.5)</b> | <b>0.0 (0.0 - 0.2)</b>  | <b>0.2 (0.1 - 0.4)</b> |                        |                  |           |      |           |        |           |

CI= Confidence Interval

\*Based on US definition – low vision was defined as <20/40 but ≥20/200; blindness was defined as <20/200.

\*\*Based on WHO definition – low vision was defined as <20/60 but ≥20/400; blindness was defined as <20/400.

†Incidence were evaluated and standardized to Singapore Population Census 2010.

**Table S9. Population Attributable Risk (PAR) of Factors Associated with Incident Presenting and Best-Corrected Visual Impairment**

| Baseline characteristics          | Population Attributable Risk* (%; PAR) |                              |
|-----------------------------------|----------------------------------------|------------------------------|
|                                   | Incident Presenting VI**               | Incident Best-Corrected VI** |
| Age (>60 years)                   | 27.1                                   | 60.4                         |
| Ethnicity                         |                                        |                              |
| • Malay                           | 15.4                                   | 25.3                         |
| History of Cardiovascular Disease | 4.21                                   | 6.11                         |
| Chronic Kidney Disease            | -                                      | 14.3                         |
| Current Smoking                   | 4.19                                   | -                            |
| Type of Housing                   |                                        |                              |
| • Smaller housing type†           | 24.7                                   | 39.5                         |
| Monthly Income, n (%)             |                                        |                              |
| • <SGD \$2,000                    | 26.4                                   | -                            |
| Education Level, n (%)            |                                        |                              |
| • No formal education             | 14.1                                   | 29.3                         |

VI= Visual Impairment, SGD= Singapore Dollars

\*PAR refers to reduction in disease incidence if the risk factor was eliminated

\*\*Based on US definition – VI was defined as VA<20/40

†Smaller housing type consists of 1 to 4 room public flat

**Table S11a. Primary Causes of Incident Presenting Visual Impairment over 6 years, Stratified by Ethnicity**

| Causes of VI*                           | Incident Presenting Low Vision* (n=507) |                |                 | Incident Presenting Blindness* (n=23) |              |               |
|-----------------------------------------|-----------------------------------------|----------------|-----------------|---------------------------------------|--------------|---------------|
|                                         | Malay (n=209)                           | Indian (n=131) | Chinese (n=167) | Malay (n=15)                          | Indian (n=3) | Chinese (n=5) |
| <b>Cataract</b>                         | 89(42.6%)                               | 42(32.1%)      | 65(38.9%)       | 13(86.7%)                             | 2(66.7%)     | 4(80.0%)      |
| <b>Under-Corrected Refractive Error</b> | 101(48.3%)                              | 67(51.1%)      | 81(48.5%)       | 1(6.7%)                               | 0(0.0%)      | 0(0.0%)       |
| <b>Glaucoma</b>                         | 1(0.5%)                                 | 0(0.0%)        | 2(1.2%)         | 1(6.7%)                               | 0(0.0%)      | 0(0.0%)       |
| <b>Diabetic Retinopathy</b>             | 5(2.4%)                                 | 8(6.1%)        | 1(0.6%)         | 0(0.0%)                               | 0(0.0%)      | 0(0.0%)       |
| <b>Age-Related Macular Degeneration</b> | 5(2.4%)                                 | 5(3.8%)        | 2(1.2%)         | 0(0.0%)                               | 0(0.0%)      | 0(0.0%)       |
| <b>Amblyopia</b>                        | 0(0.0%)                                 | 2(1.5%)        | 0(0.0%)         | 0(0.0%)                               | 0(0.0%)      | 0(0.0%)       |
| <b>Corneal Diseases</b>                 | 1(0.5%)                                 | 0(0.0%)        | 1(0.6%)         | 0(0.0%)                               | 0(0.0%)      | 0(0.0%)       |
| <b>Maculopathy</b>                      | 0(0.0%)                                 | 1(0.8%)        | 2(1.2%)         | 0(0.0%)                               | 0(0.0%)      | 0(0.0%)       |
| <b>Epiretinal Membrane</b>              | 1(0.5%)                                 | 0(0.0%)        | 1(0.6%)         | 0(0.0%)                               | 0(0.0%)      | 0(0.0%)       |
| <b>Posterior Capsular Opacification</b> | 1(0.5%)                                 | 5(3.8%)        | 7(4.2%)         | 0(0.0%)                               | 1(33.3%)     | 0(0.0%)       |
| <b>Pterygium</b>                        | 1(0.5%)                                 | 0(0.0%)        | 0(0.0%)         | 0(0.0%)                               | 0(0.0%)      | 1(20.0%)      |
| <b>Retinal Vein Occlusion</b>           | 1(0.5%)                                 | 1(0.8%)        | 0(0.0%)         | 0(0.0%)                               | 0(0.0%)      | 0(0.0%)       |
| <b>Myopia Maculopathy</b>               | 2(1.0%)                                 | 0(0.0%)        | 3(1.8%)         | 0(0.0%)                               | 0(0.0%)      | 0(0.0%)       |
| <b>Others</b>                           | 1(0.5%)                                 | 0(0.0%)        | 2(1.2%)         | 0(0.0%)                               | 0(0.0%)      | 0(0.0%)       |

VI= Visual Impairment; N/A= Not Applicable

Data presented as number (percentage)

\*Based on US definition – low vision was defined as <20/40 but ≥20/200; blindness was defined as <20/200



**Table S11b. Primary Causes of Incident Best-Corrected Visual Impairment over 6 years, Stratified by Ethnicity**

| Causes of VI*                           | Incident Best-Corrected Low Vision* (n=217) |               |                | Incident Best-corrected Blindness* (n=14) |              |               |
|-----------------------------------------|---------------------------------------------|---------------|----------------|-------------------------------------------|--------------|---------------|
|                                         | Malay (n=108)                               | Indian (n=47) | Chinese (n=62) | Malay (n=9)                               | Indian (n=2) | Chinese (n=3) |
| <b>Cataract</b>                         | 80(74.1%)                                   | 30(63.8%)     | 45(72.6%)      | 7(77.8%)                                  | 0(0.0%)      | 2(66.7%)      |
| <b>Under-Corrected Refractive Error</b> | 0(0.0%)                                     | 0(0.0%)       | 0(0.0%)        | 0(0.0%)                                   | 0(0.0%)      | 0(0.0%)       |
| <b>Glaucoma</b>                         | 3(2.8%)                                     | 0(0.0%)       | 2(3.2%)        | 1(11.1%)                                  | 0(0.0%)      | 0(0.0%)       |
| <b>Diabetic Retinopathy</b>             | 8(7.4%)                                     | 5(10.6%)      | 0(0.0%)        | 0(0.0%)                                   | 0(0.0%)      | 0(0.0%)       |
| <b>Age-Related Macular Degeneration</b> | 8(7.4%)                                     | 3(6.4%)       | 5(8.1%)        | 0(0.0%)                                   | 0(0.0%)      | 0(0.0%)       |
| <b>Amblyopia</b>                        | 1(0.9%)                                     | 1(2.1%)       | 0(0.0%)        | 0(0.0%)                                   | 0(0.0%)      | 0(0.0%)       |
| <b>Corneal Diseases</b>                 | 0(0.0%)                                     | 0(0.0%)       | 2(3.2%)        | 0(0.0%)                                   | 0(0.0%)      | 0(0.0%)       |
| <b>Maculopathy</b>                      | 3(2.8%)                                     | 2(4.3%)       | 3(4.8%)        | 0(0.0%)                                   | 0(0.0%)      | 0(0.0%)       |
| <b>Epiretinal Membrane</b>              | 1(0.9%)                                     | 1(2.1%)       | 0(0.0%)        | 0(0.0%)                                   | 0(0.0%)      | 0(0.0%)       |
| <b>Posterior Capsular Opacification</b> | 2(1.9%)                                     | 5(10.6%)      | 1(1.6%)        | 0(0.0%)                                   | 2(100.0%)    | 0(0.0%)       |
| <b>Pterygium</b>                        | 0(0.0%)                                     | 0(0.0%)       | 0(0.0%)        | 0(0.0%)                                   | 0(0.0%)      | 1(33.3%)      |
| <b>Retinal Vein Occlusion</b>           | 0(0.0%)                                     | 0(0.0%)       | 0(0.0%)        | 0(0.0%)                                   | 0(0.0%)      | 0(0.0%)       |
| <b>Myopia Maculopathy</b>               | 1(0.9%)                                     | 0(0.0%)       | 1(1.6%)        | 0(0.0%)                                   | 0(0.0%)      | 0(0.0%)       |
| <b>Others</b>                           | 1(0.9%)                                     | 0(0.0%)       | 3(4.8%)        | 1(11.1%)                                  | 0(0.0%)      | 0(0.0%)       |

VI= Visual Impairment; N/A= Not Applicable

Data presented as number (percentage)

\*Based on US definition – low vision was defined as <20/40 but ≥20/200; blindness was defined as <20/200

**Supplementary Table S13. Association between Baseline Factors and Likelihood of Remaining Visually Impaired over 6 Years**

| Baseline characteristics           | Subjects with Baseline VI* who Remained Visually Impaired over 6 Years |         |                           |         |
|------------------------------------|------------------------------------------------------------------------|---------|---------------------------|---------|
|                                    | Presenting VI* (n= 438)                                                |         | Best-Corrected VI* (n=94) |         |
|                                    | Relative Risk** (95% CI)                                               | P-value | Relative Risk** (95% CI)  | P-value |
| Age, per decade                    | 1.17 (1.06 - 1.29)                                                     | 0.001   | 1.22 (0.96 - 1.55)        | 0.101   |
| Female Gender                      | 1.02 (0.86 - 1.22)                                                     | 0.794   | 1.10 (0.73 - 1.66)        | 0.633   |
| Ethnicity                          |                                                                        |         |                           |         |
| • Chinese                          | Reference                                                              | -       | Reference                 | -       |
| • Malay                            | 1.62 (1.35 - 1.94)                                                     | <0.001  | 1.56 (1.04 - 2.34)        | 0.030   |
| • Indian                           | 1.30 (1.06 - 1.58)                                                     | 0.011   | 1.26 (0.82 - 1.94)        | 0.296   |
| Diabetes Mellitus                  | 1.03 (0.88 - 1.20)                                                     | 0.718   | 1.03 (0.76 - 1.40)        | 0.840   |
| Hyperlipidaemia                    | 0.89 (0.77 - 1.03)                                                     | 0.121   | 0.84 (0.62 - 1.15)        | 0.284   |
| Hypertension                       | 1.14 (0.93 - 1.38)                                                     | 0.205   | 1.34 (0.73 - 2.44)        | 0.343   |
| History of Cardiovascular Disease  | 0.98 (0.78 - 1.22)                                                     | 0.839   | 1.54 (1.06 - 2.23)        | 0.022   |
| Chronic Kidney Disease             | 1.04 (0.88 - 1.23)                                                     | 0.626   | 0.75 (0.53 - 1.06)        | 0.104   |
| Alcohol Intake                     | 1.30 (0.94 - 1.80)                                                     | 0.111   | 1.80 (0.81 - 4.01)        | 0.150   |
| Current Smoking                    | 0.90 (0.68 - 1.18)                                                     | 0.443   | 0.76 (0.42 - 1.39)        | 0.375   |
| Body Mass Index, kg/m <sup>2</sup> | 1.00 (0.98 - 1.01)                                                     | 0.795   | 1.01 (0.97 - 1.04)        | 0.718   |
| Type of Housing                    |                                                                        |         |                           |         |
| • 5 room public flat and better    | Reference                                                              | -       | Reference                 | -       |
| • 1-2 room public flat             | 1.01 (0.79 - 1.29)                                                     | 0.944   | 1.42 (0.86 - 2.35)        | 0.166   |
| • 3-4 room public flat             | 0.85 (0.71 - 1.02)                                                     | 0.083   | 0.97 (0.63 - 1.48)        | 0.881   |
| Monthly Income, n (%)              |                                                                        |         |                           |         |
| • ≥SGD \$2,000                     | Reference                                                              | -       | Reference                 | -       |
| • <SGD \$2,000                     | 1.70 (1.16 - 2.50)                                                     | 0.007   | 0.60 (0.16 - 2.23)        | 0.449   |
| Education Level, n (%)             |                                                                        |         |                           |         |
| • Formal education <sup>†</sup>    | Reference                                                              | -       | Reference                 | -       |
| • No formal education              | 1.23 (1.04 - 1.45)                                                     | 0.018   | 1.32 (0.91 - 1.91)        | 0.146   |

VI= Visual Impairment; VA= Visual Acuity; CI= Confidence Interval; SGD= Singapore dollars

\*Based on US definition – visual impairment was defined as <20/40, based on better-seeing eye.

\*\*Adjusted for age, gender, ethnicity, diabetes mellitus, hyperlipidaemia, hypertension, history of cardiovascular disease, chronic kidney disease, alcohol intake, current smoking, body mass index, type of housing, monthly income, and education level.

†Formal education was defined as having primary or higher education.

**Table S14. Comparison of Baseline Characteristics between Included and Excluded Subjects**

| Baseline characteristics                 | Included*<br>(n= 5,551) | Excluded**<br>(n=2,491) | P-value† |
|------------------------------------------|-------------------------|-------------------------|----------|
| Age, years                               | 56.1 (8.9)              | 59.7 (11.1)             | <0.001   |
| Female Gender, n (%)                     | 2801 (50.5)             | 1276 (51.2)             | 0.526    |
| Ethnicity, n (%)                         |                         |                         | <0.001   |
| • Malay                                  | 1526 (27.5)             | 964 (38.7)              |          |
| • Indian                                 | 1837 (33.1)             | 999 (40.1)              |          |
| • Chinese                                | 2188 (39.4)             | 528 (21.2)              |          |
| Diabetes Mellitus, n (%)                 | 1408 (25.4)             | 800 (32.1)              | <0.001   |
| Hyperlipidaemia, n (%)                   | 2377 (43.8)             | 1065 (44.9)             | 0.403    |
| Hypertension, n (%)                      | 3174 (57.3)             | 1703 (68.6)             | <0.001   |
| History of Cardiovascular Disease, n (%) | 455 (8.2)               | 294 (11.8)              | <0.001   |
| Chronic Kidney Disease, n (%)            | 389 (7.3)               | 349 (14.8)              | <0.001   |
| Alcohol Intake, n (%)                    | 518 (9.3)               | 200 (8.1)               | 0.064    |
| Current Smoking, n (%)                   | 824 (14.9)              | 485 (19.5)              | <0.001   |
| Body Mass Index, kg/m <sup>2</sup>       | 25.4 (4.4)              | 25.7 (5.1)              | 0.002    |
| Type of Housing, n (%)                   |                         |                         | <0.001   |
| • 1-2 room public flat                   | 255 (4.6)               | 247 (10.0)              |          |
| • 3-4 room public flat                   | 3266 (59.0)             | 1617 (65.1)             |          |
| • 5-room public flat and better          | 2012 (36.4)             | 618 (24.9)              |          |
| Monthly Income, n (%)                    |                         |                         | <0.001   |
| • <SGD \$2,000                           | 3811 (70.2)             | 2043 (84.0)             |          |
| • ≥SGD \$2,000                           | 1617 (29.8)             | 390 (16.0)              |          |
| Education Level, n (%)                   |                         |                         | <0.001   |
| • No formal education                    | 824 (14.9)              | 683 (27.5)              |          |
| • Formal education‡                      | 4718 (85.1)             | 1798 (72.5)             |          |

SGD= Singapore Dollars

Data presented as mean (standard deviation) or number (percentage), where appropriate.

\*Subjects included in the final analysis for incident presenting VI (based on US definition – VI was defined as VA<20/40; i.e. inclusive of low vision and blindness, based on better-seeing eye)

\*\*Subjects excluded from the final analysis for incident presenting VI (not including death cases)

†P-value was estimated based on chi-squared or independent t-test, where appropriate

‡Formal education was defined as having primary or higher education.
